# Supplementary material for: Graphene oxide (GO)-interlayered thin-film nanocomposite (TFN) membranes with high solvent resistance for organic solvent nanofiltration (OSN)
Source: Royal Society of Chemistry journal article supplement (doi:10.1039/c9ta01915d), 2019-01-01
Supplement: c9ta01915d1.pdf [file c9ta01915d1.pdf]

**Graphene oxide (GO) interlayered thin film nanocomposite (TFN) membranes  
with high solvent resistance for organic solvent nanofiltration (OSN)**

Yanyang Li<sup>1,2</sup>, Can Li<sup>1,2</sup>, Shuxuan Li<sup>1,2</sup>, Baowei Su<sup>1,2\*</sup>, Lihui Han<sup>1,2\*</sup>, Bishnupada Mandal<sup>3,\*</sup>

<sup>1</sup> Key Laboratory of Marine Chemistry Theory and Technology (Ocean University of China),  
Ministry of Education, 238 Songling Road, Qingdao, 266100, China

<sup>2</sup> College of Chemistry & Chemical Engineering, Ocean University of China, 238 Songling  
Road, Qingdao, 266100, China

<sup>3</sup> Department of Chemical Engineering, Indian Institute of Technology Guwahati, Guwahati  
781039, India

---

\* Corresponding authors.

Phone / Fax: +86 - 532 - 66786371, Email : subaowei@ouc.edu.cn (B. Su); Phone:  
+91 3612582256 / +91 - 9957181980, Fax: +91 361 2582291, E - mail:  
bpmandal@iitg.ac.in (B.Mandal)

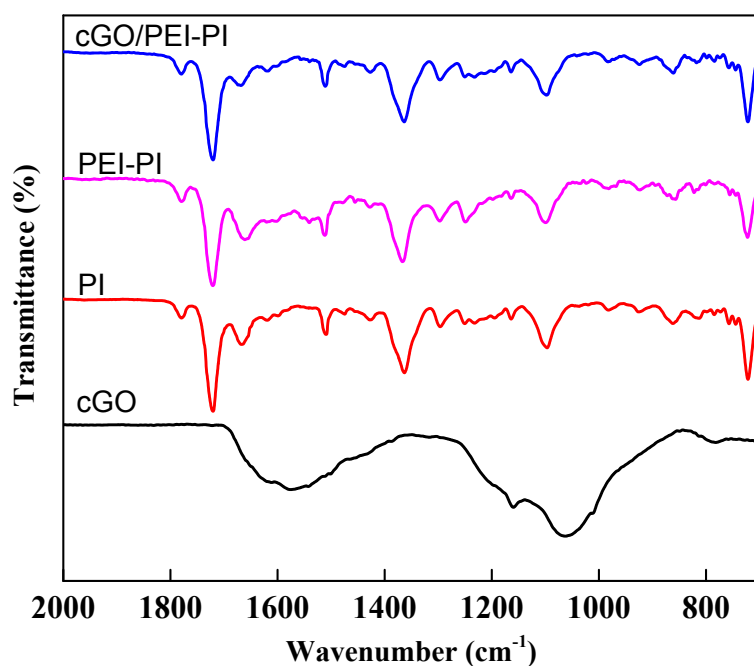

Fig. S1 The FTIR spectra of the cGO nanosheets, PI substrate, PEI-PI substrate, and cGO/PEI-PI substrate. (PEI: the concentration is 5 mg L<sup>-1</sup>, the reaction time and temperature were 30 s and 25 °C; cGO nanosheets: the concentration is 2 mg L<sup>-1</sup>, the deposition time is 60 s)

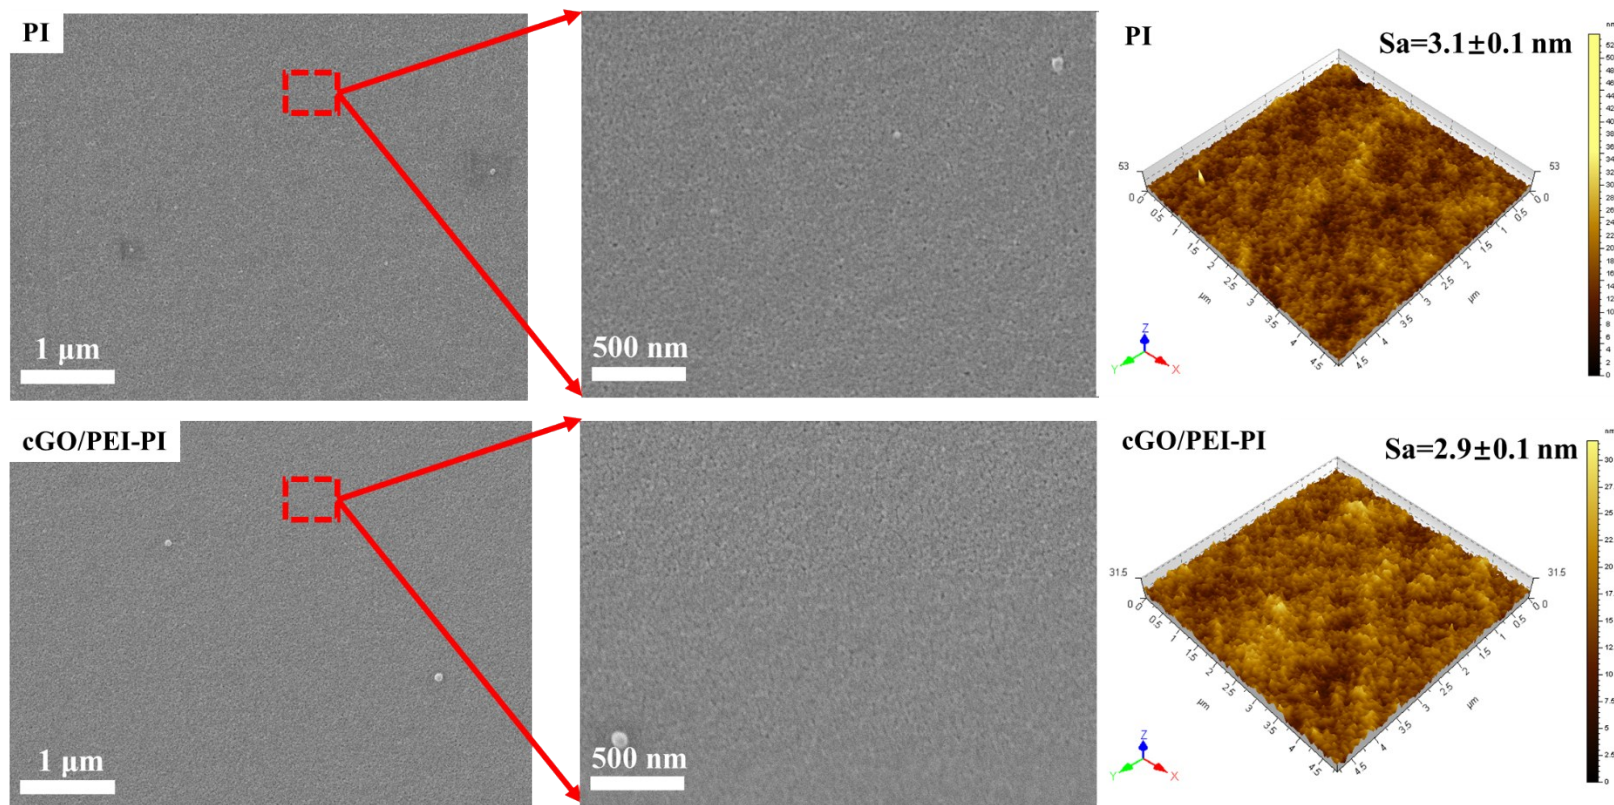

Fig. S2 Surface SEM and AFM images of the PI and cGO/PEI-PI substrate.

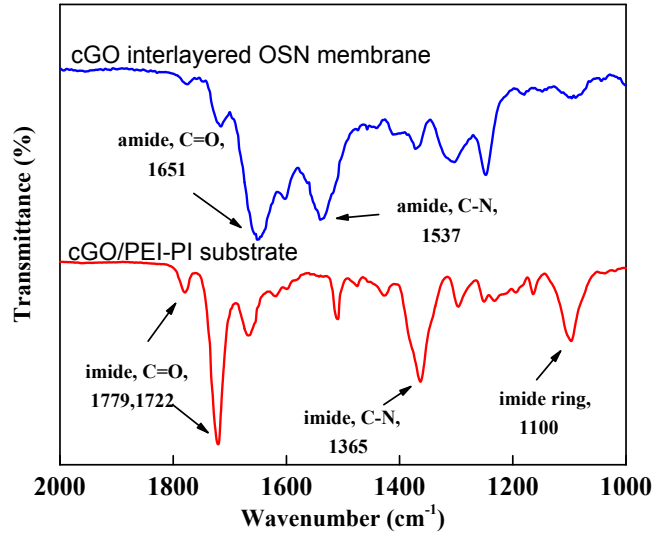

Fig. S3 The FTIR spectra of the interlayer OSN membrane and PI substrate. (PEI: the concentration is 5 mg L<sup>-1</sup>, the reaction time and temperature were 30 s and 25 °C; cGO nanosheets: the concentration is 2 mg L<sup>-1</sup>, the deposition time is 60 s)

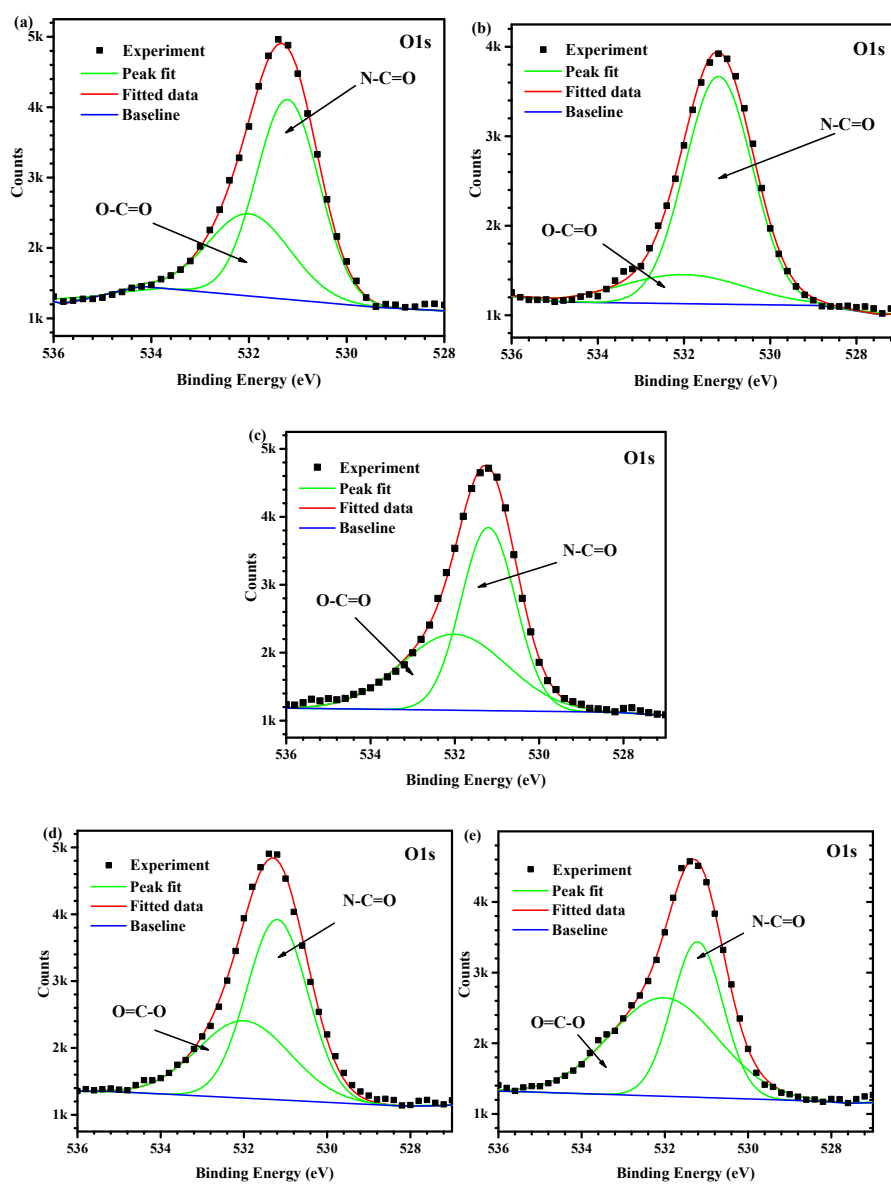

Fig. S4 High-resolution O1s spectra of the cGO-interlayered OSN membranes with different PEI concentration. (a) 1 mg L<sup>-1</sup>; (b) 5 mg L<sup>-1</sup>; (c) 10 mg L<sup>-1</sup>; (d) 100 mg L<sup>-1</sup>; (e) 1000 mg L<sup>-1</sup>.

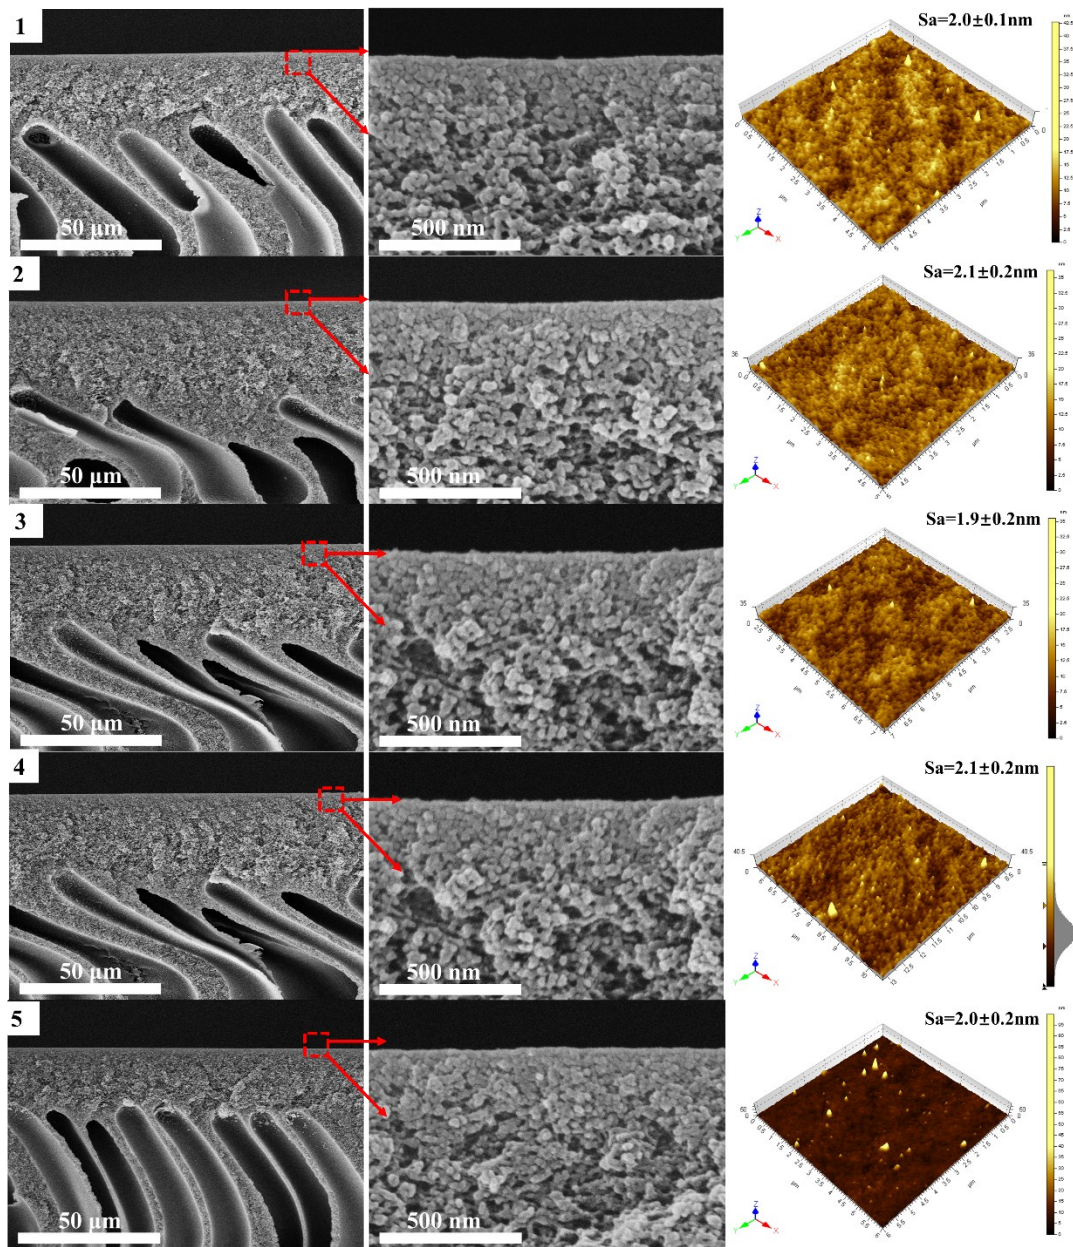

Fig. S5 Cross-sectional SEM images and surface AFM morphologies of the cGO-interlayered OSN membranes with different PEI concentration. (1) 1 mg L<sup>-1</sup>; (2) 5 mg L<sup>-1</sup>; (3) 10 mg L<sup>-1</sup>; (4) 100 mg L<sup>-1</sup>; (5) 1000 mg L<sup>-1</sup>.



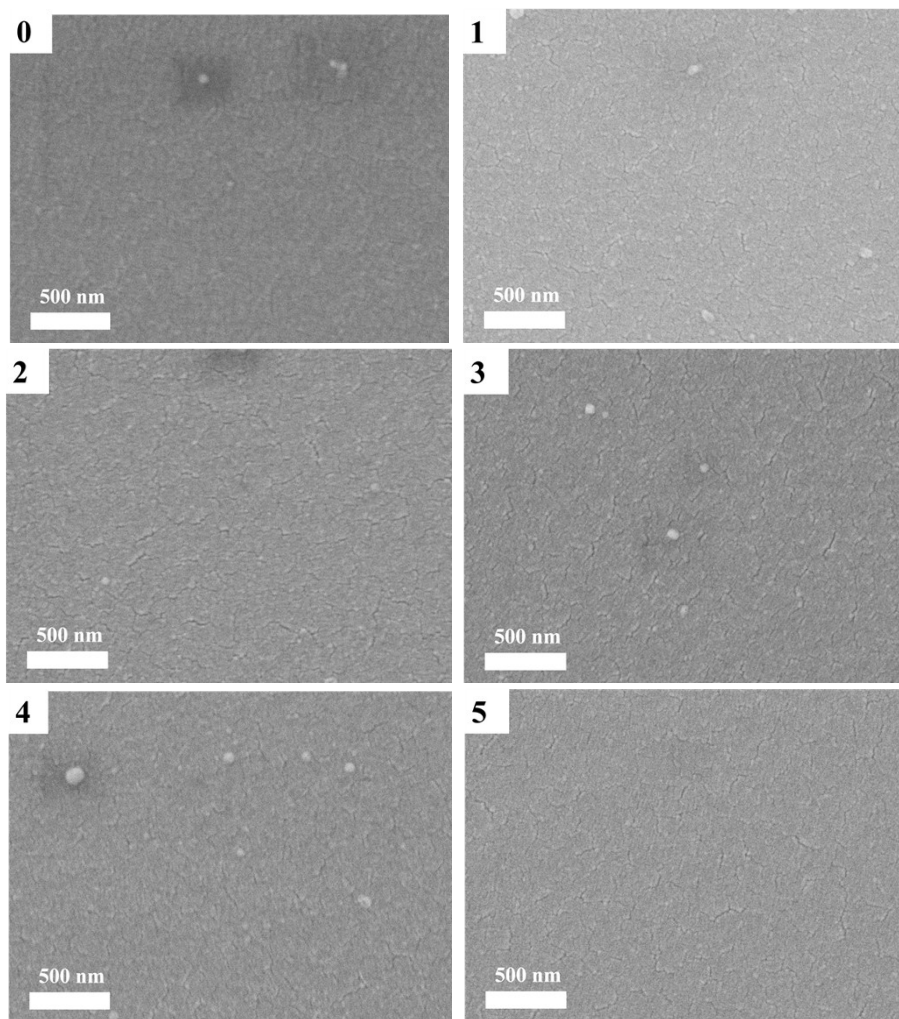

Fig. S6 SEM images of surface morphologies of the cGO-interlayered OSN membranes with different PEI concentration. (0) 0 mg L<sup>-1</sup>; (1) 1 mg L<sup>-1</sup>; (2) 5 mg L<sup>-1</sup>; (3) 10 mg L<sup>-1</sup>; (4) 100 mg L<sup>-1</sup>; (5) 1000 mg L<sup>-1</sup>.

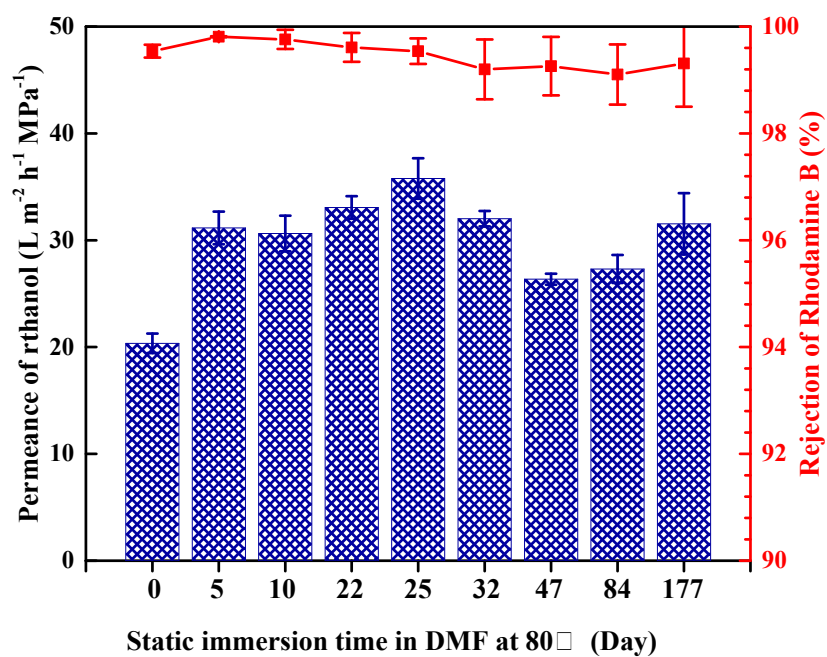

Fig. S7 Long-term static immersion in DMF at 80 °C for the cGO-interlayered OSN membrane. (The other conditions were the same as the optimized cGO-interlayered OSN membrane except that the PEI concentration was 100 mg L<sup>-1</sup>)



Before cleaning

After cleaning

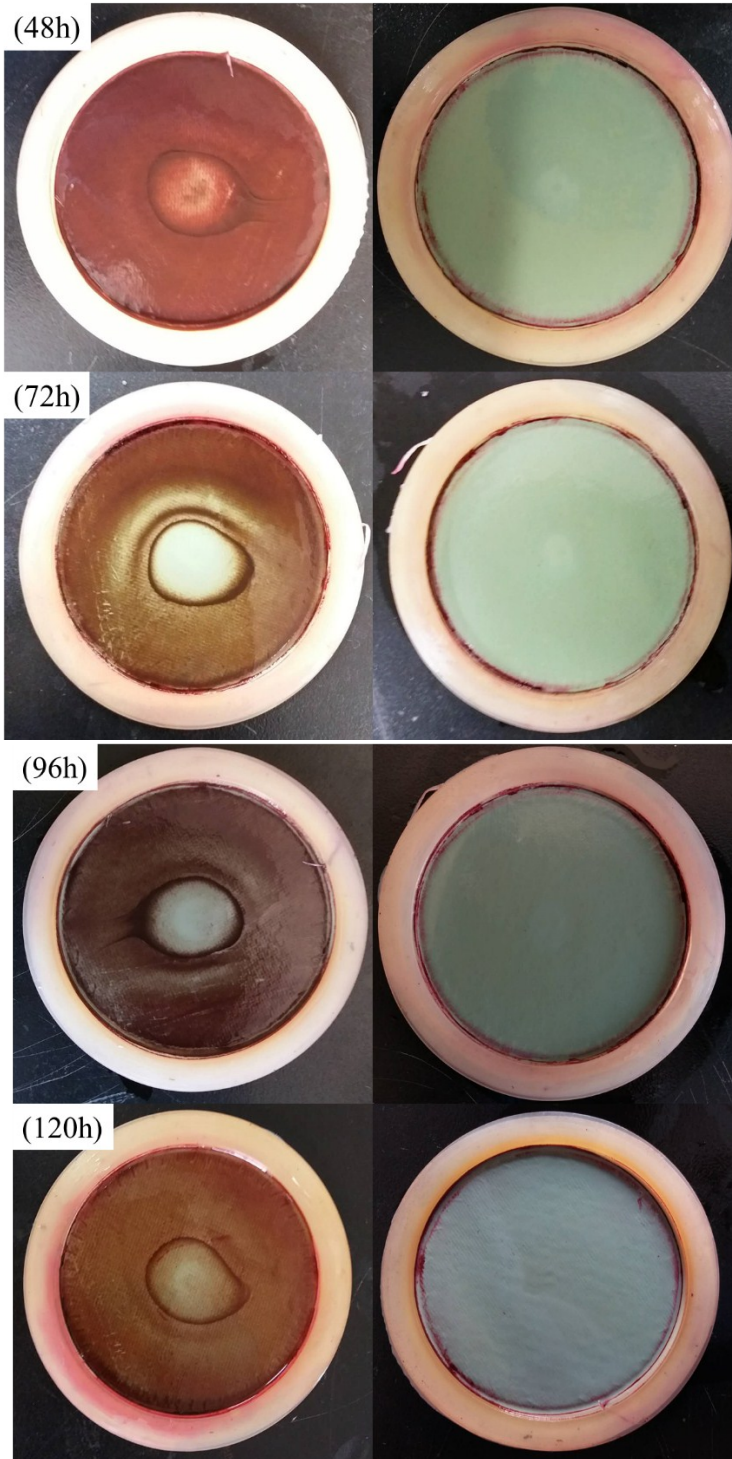

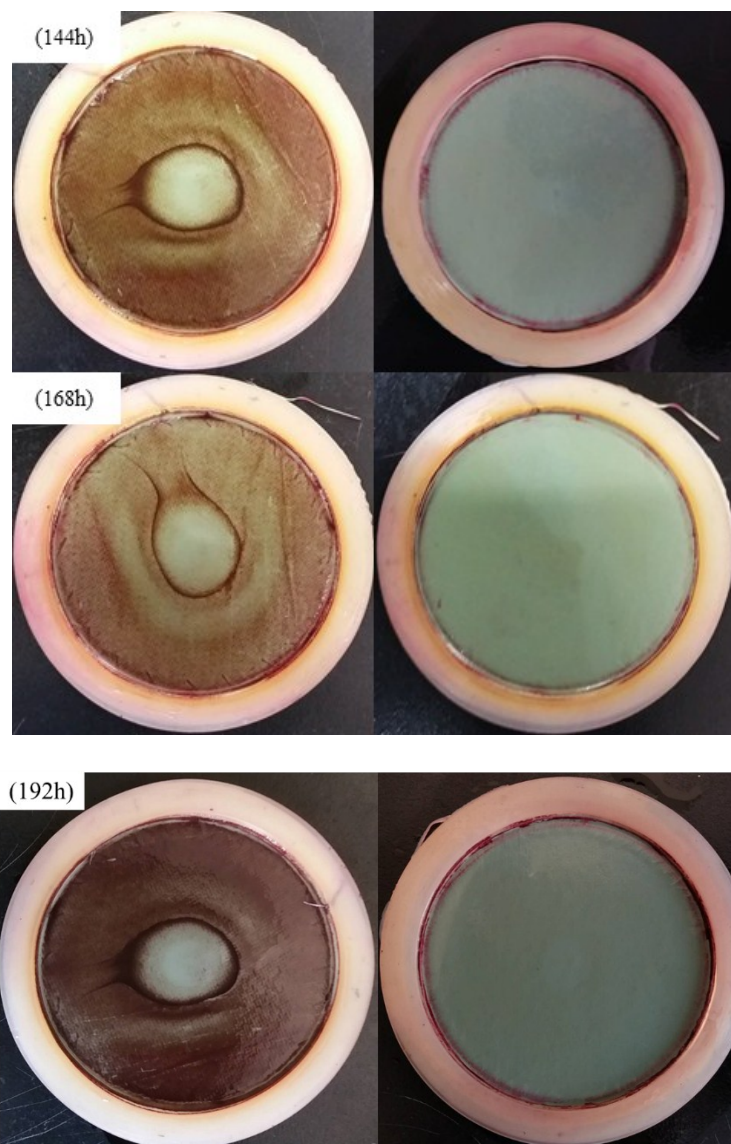

Fig. S8 the images of the cGO-interlayered OSN membrane after the continuous cross-flow filtration of 100 mg L<sup>-1</sup> RB/DMF solution at room temperature for different time. (before and after cleaning with DMF)

Table S1 The percentage of the cGO-interlayered membranes with different PEI concentration from XPS.

| PEI<br>concentration<br>(mg L <sup>-1</sup> ) | C1s            |         |       | N1s            |                                 |       | O1s            |         |       |
|-----------------------------------------------|----------------|---------|-------|----------------|---------------------------------|-------|----------------|---------|-------|
|                                               | Binding        |         |       | Binding        |                                 |       | Binding        |         |       |
|                                               | Energy<br>(eV) | Species | (%)   | Energy<br>(eV) | Species                         | (%)   | Energy<br>(eV) | Species | (%)   |
| 1                                             | 284.7          | C-H/C-C | 66.27 | 399.9          | N-C=O                           | 91.20 | 531.2          | N-C=O   | 65.15 |
|                                               | 286.0          | C-N     | 20.35 |                |                                 |       |                |         |       |
|                                               | 288.0          | N-C=O   | 13.38 |                |                                 |       |                |         |       |
| 5                                             | 284.7          | C-H/C-C | 74.98 | 399.0          | R-NH <sub>2</sub>               | 18.20 | 531.2          | N-C=O   | 81.00 |
|                                               | 286.0          | C-N     | 15.86 | 399.9          | N-C=O                           | 71.78 |                |         |       |
|                                               | 288.0          | N-C=O   | 9.16  | 401.7          | R-N <sup>+</sup> H <sub>3</sub> | 10.02 |                |         |       |

|      |       |         |       |       |       |       |       |       |       |
|------|-------|---------|-------|-------|-------|-------|-------|-------|-------|
| 10   | 284.7 | C-H/C-C | 74.90 | 399.9 | N-C=O | 83.63 | 531.2 | N-C=O | 55.55 |
|      | 286.0 | C-N     | 11.27 |       |       |       |       |       |       |
|      | 288.0 | N-C=O   | 13.83 |       |       |       |       |       |       |
| 100  | 284.7 | C-H/C-C | 67.55 | 399.9 | N-C=O | 84.60 | 531.2 | N-C=O | 60.60 |
|      | 286.0 | C-N     | 20.00 |       |       |       |       |       |       |
|      | 288.0 | N-C=O   | 12.45 |       |       |       |       |       |       |
| 1000 | 284.7 | C-H/C-C | 77.56 | 399.9 | N-C=O | 82.17 | 531.2 | N-C=O | 42.77 |
|      | 286.0 | C-N     | 9.36  |       |       |       |       |       |       |
|      | 288.0 | N-C=O   | 13.08 |       |       |       |       |       |       |

Table S2 Contact angle of the PI substrates with different PEI concentration with/without cGO nanosheets

| PEI concentration<br>(mg L <sup>-1</sup> ) | Contact angle<br>(°) |            |
|--------------------------------------------|----------------------|------------|
|                                            | PEI-PI               | cGO/PEI-PI |
| 1                                          | 70.6 ± 0.8           | 71.3 ± 0.4 |
| 5                                          | 70.1 ± 1.0           | 55.1 ± 0.8 |
| 10                                         | 70.0 ± 0.3           | 51.2 ± 0.1 |
| 100                                        | 69.3 ± 0.4           | 49.2 ± 0.2 |
| 1000                                       | 63.9 ± 0.6           | 48.3 ± 0.7 |

Table S3 Physical properties of different solvents.<sup>1-6</sup>

| Solvent  | Polarity Index | Viscosity, (cP) | Surface tension, (dyne/cm) | Hansen solubility parameter, (MPa <sup>-1/2</sup> ) | Hansen solubility parameter for polarity (MPa <sup>-1/2</sup> ) | Kinetic diameter, (nm) | Molar volume, (cm <sup>3</sup> /mol) |
|----------|----------------|-----------------|----------------------------|-----------------------------------------------------|-----------------------------------------------------------------|------------------------|--------------------------------------|
| DMF      | 6.4            | 0.920           | 37.1                       | 24.7                                                | 13.7 <sup>3</sup>                                               | 0.55                   | 77.11                                |
| Acetone  | 5.1            | 0.312           | 24.6                       | 19.3                                                | 10.4                                                            | 0.46                   | 74.1                                 |
| THF      | 4.0            | 0.480           | 26.4                       | 19.4                                                | 5.7 <sup>3</sup>                                                | 0.47                   | 82.1                                 |
| EtOH     | 4.3            | 1.018           | 22.34                      | 25.0                                                | 8.8                                                             | 0.44                   | 58.2                                 |
| IPA      | 3.9            | 2.092           | 23.34                      | 21.3                                                | 7.2                                                             | 0.47                   | 77.2                                 |
| n-Hexane | 0.1            | 0.307           | 18.17                      | 14.9                                                | 0                                                               | 0.43                   | 1304                                 |



## Reference

1. L. Huang, Y. Li, Q. Zhou, W. Yuan and G. Shi, *ADV Mater*, 2015, **27**, 3797-3802.
2. Abozar Akbari, Sally E. Meragawi, Samuel T. Martin, Ben Corry, Ezzatollah Shamsaei, Christopher D. Easton, Dibakar Bhattacharyya and a. M. Majumder, *ACS Appl Mater Interfaces*, 2018, DOI: 10.1021/acsami.7b11777.
3. Z. F. Gao, G. M. Shi, Y. Cui and T.-S. Chung, *Journal of Membrane Science*, 2018, **565**, 169-178.
4. A. Asadi Tashvigh, L. Luo, T.-S. Chung, M. Weber and C. Maletzko, *Journal of Membrane Science*, 2018, **551**, 204-213.
5. M. H. Davood Abadi Farahani and T.-S. Chung, *Separation and Purification Technology*, 2019, **209**, 182-192.
6. Dan Hua, Susilo Japip, Kai Yu Wang and T.-S. Chung, *ACS Sustainable Chemistry & Engineering*, 2018, DOI: 10.1021/.
